# Supplementary material for: Specific protein supplementation using soya, casein or whey differentially affects regional gut growth and luminal growth factor bioactivity in rats; implications for the treatment of gut injury and stimulating repair
Source: Royal Society of Chemistry journal article supplement (doi:10.1039/c7fo01251a), 2017-11-17
Supplement: c7fo01251a1.pdf [file c7fo01251a1.pdf]

**Supplemental Table 1. Composition of feeds used for study.**

|                                           | E028<br>(ED)                            | E028 and casein<br>400g cans<br>(ED + C)         | E028 and whey<br>protein<br>400g cans<br>(ED + W) | Soya protein<br>enhanced diet<br>(SP)                                         |
|-------------------------------------------|-----------------------------------------|--------------------------------------------------|---------------------------------------------------|-------------------------------------------------------------------------------|
| Digestible protein<br>equivalent (g/100g) | 12.5                                    | 13.8                                             | 13.8                                              | 12.9                                                                          |
| Energy content<br>(kcal/100g)             | 443                                     | 447                                              | 447                                               | 354                                                                           |
| Total amino acid<br>content (g)           | 15                                      | 15                                               | 15                                                | 14.22                                                                         |
| Fat content (g)                           | 17.45                                   | 17.45                                            | 17.45                                             | 2.6                                                                           |
| Carbohydrate source                       | Dried glucose<br>syrup                  | Dried glucose<br>syrup                           | Dried glucose<br>syrup                            | Wheat, barley,                                                                |
| Nitrogen source                           | Crystalline amino<br>acids              | Crystalline amino<br>acids +  casein<br>proteins | Crystalline amino<br>acids + whey<br>proteins     | Soya protein,<br>soya protein<br>concentrate,<br>wheat and<br>barley proteins |
| Fat source                                | Coconut,<br>safflower and<br>canola oil | Coconut, safflower<br>and canola oil             | Coconut, safflower<br>and canola oil              | Soya oil                                                                      |
| Nitrogen content (%)                      | 2.2                                     | 2                                                | 2.1                                               | 2.35                                                                          |

1. ED – elemental diet
2. ED + C - elemental diet + casein
3. ED + W - elemental diet + whey protein
4. SP-soya protein enhanced diet
